# Supplementary material for: Porous and highly conducting cathode material PrBaCo2O6−δ: bulk and surface studies of synthesis anomalies
Source: Royal Society of Chemistry journal article supplement (doi:10.1039/c9cp01813a), 2019-01-01
Supplement: c9cp01813a1.pdf [file c9cp01813a1.pdf]

## Porous and high conducting cathode material $\text{PrBaCo}_2\text{O}_{6-\delta}$ : The bulk and surface studies for synthesis anomaly

Ajay S Bangwal<sup>1</sup>, Pardeep K. Jha<sup>1</sup>, Pawan K. Dubey<sup>1</sup>, Manish K. Singh<sup>2</sup>, A. S. K. Sinha<sup>3</sup>, Vasant Sathe<sup>4</sup>, Priyanka A. Jha<sup>1,\*</sup> and Prabhakar Singh<sup>1,\*</sup>

<sup>1</sup> Department of Physics, Indian Institute of Technology (Banaras Hindu University) Varanasi, Varanasi-221005 (India)

<sup>2</sup> Department of Metallurgical Engineering, Indian Institute of Technology (Banaras Hindu University) Varanasi, Varanasi-221005 (India)

<sup>3</sup> Department of Chemical Engineering, Indian Institute of Technology (Banaras Hindu University) Varanasi, Varanasi-221005 (India)

<sup>4</sup> UGC-DAE consortium for Scientific research, University Campus, Khandwa Road, Indore-452017 (India)

e-mail: priyankajha.dce@gmail.com(PAJ), psingh.app@iitbhu.ac.in(PS)

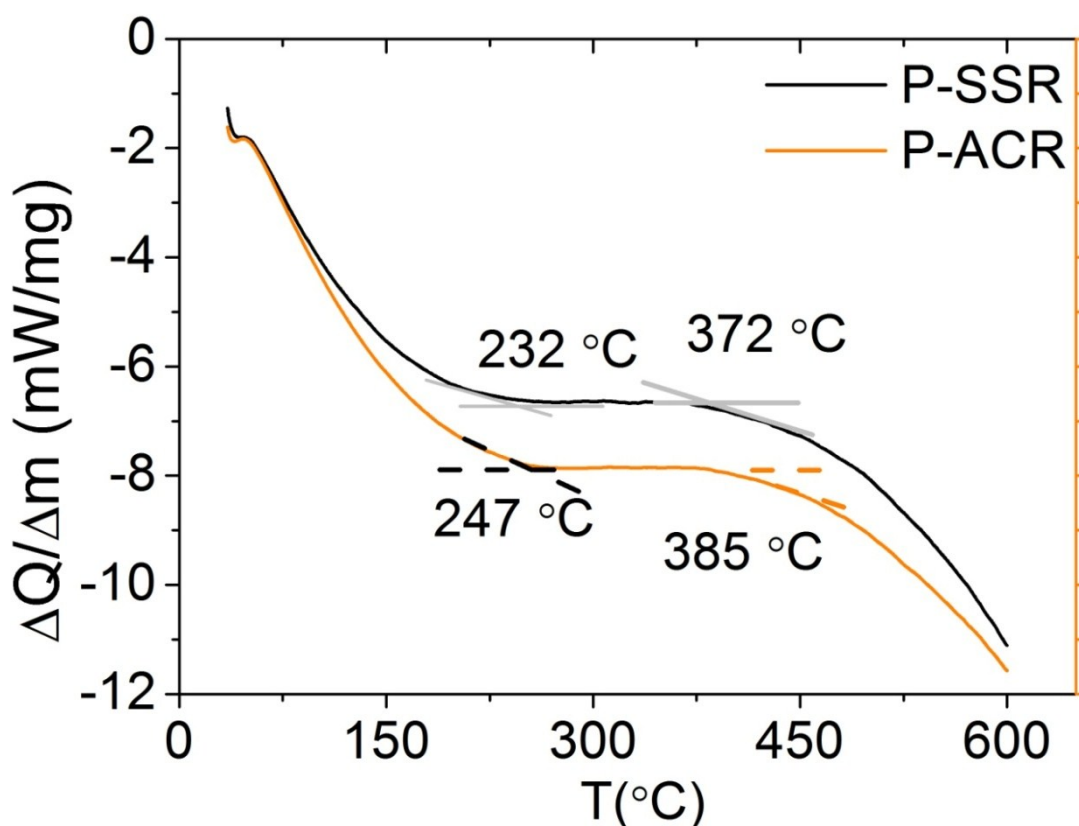

**Figure S1** Variation of  $\Delta Q/\Delta m$  with temperature (°C), the curves are showing a plateau around  $T_{\text{decompose}}$  showing the thermal stability. This plateau is formed at higher temperature in ACR in comparison to SSR i.e. 232 °C – 372 °C in SSR and 247 °C – 385 °C in ACR.

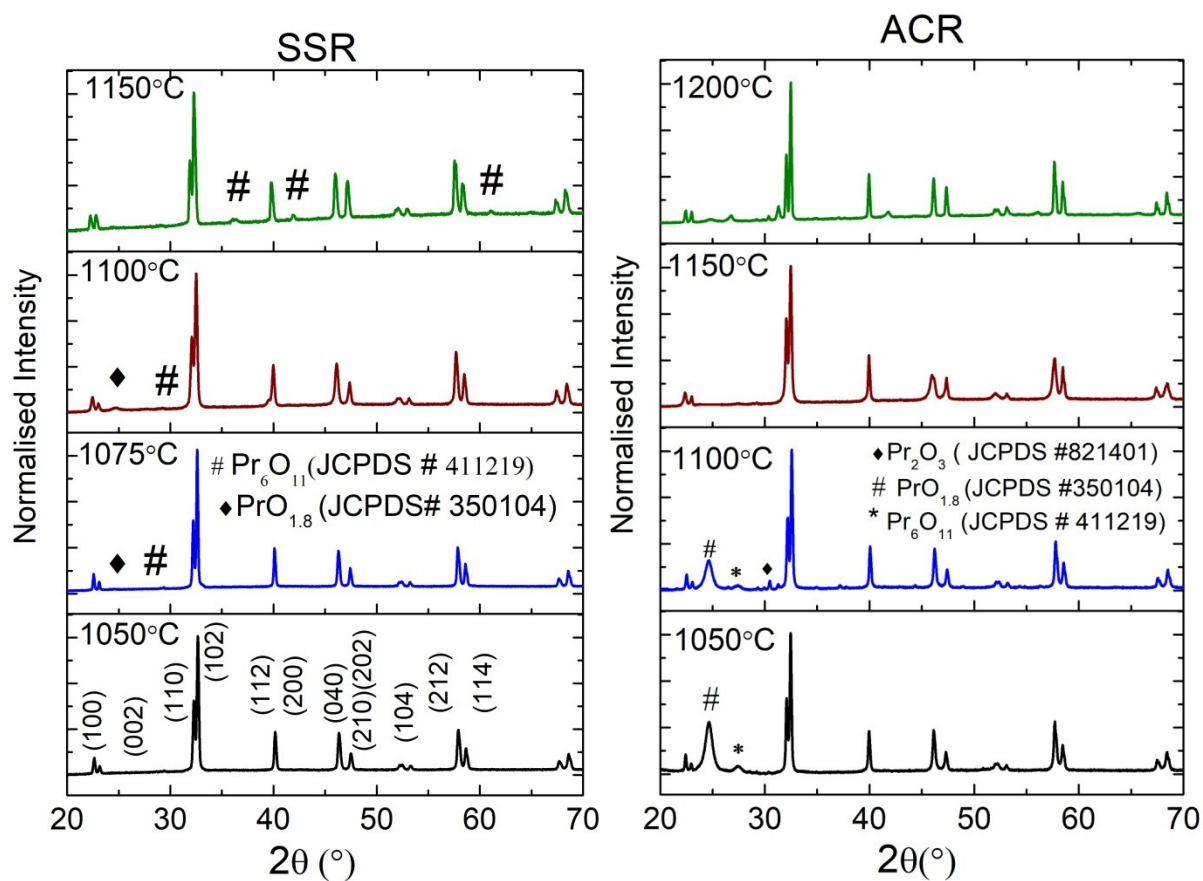

**Figure S2** In case of ACR, the calcined powder is sintered at 1050 °C, 1100 °C, 1150 °C and 1200 °C for 10 h. While in case of SSR, the calcined powder is sintered at 1050 °C, 1075 °C, 1100 °C for 10 h, 1150 °C. The samples synthesized through SSR have shown secondary phase of  $\text{PrO}_{1.8}$  with the increase in sintering temperature and the sample melted at 1200 °C and 1300 °C (photographs of the samples shown in the manuscript Fig.2) whereas, in ACR, the secondary phase has diminished with the increase in sintering temperature and is minimum at 1150 °C and re-appears at 1200 °C.

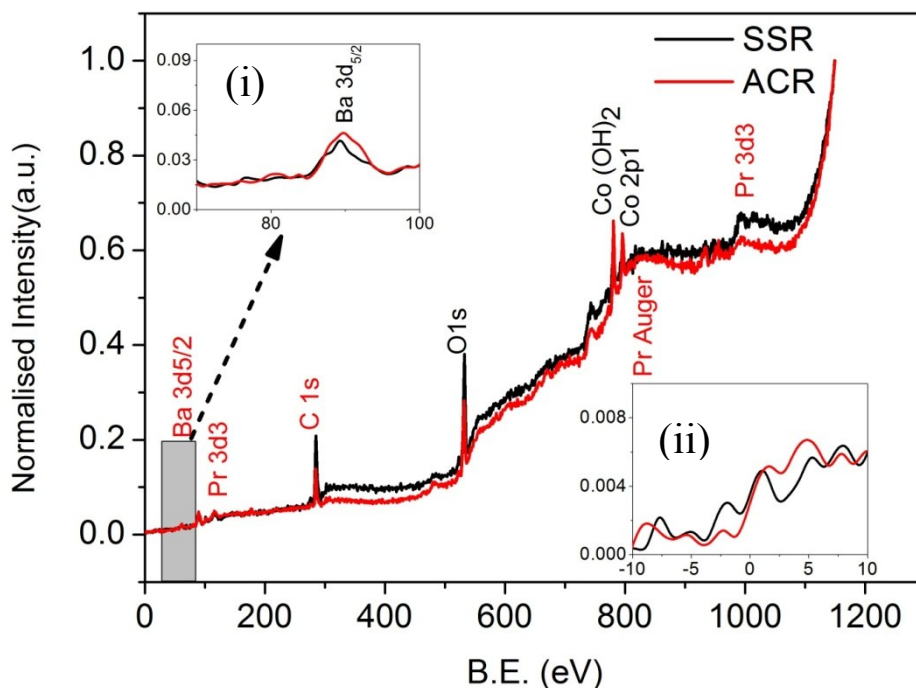

**Figure S3** For the contribution of electronic states in the compounds, wide X-ray Photoelectron spectroscopy (XPS) spectrum for the optimized samples and indexing done using standard look up table. In the spectrum, it is very difficult to distinguish between Co and Ba peak, as they are highly overlapped  $\sim 800$  eV (inset (i)). Ba 3d peak is checked at 85 eV and is present in both the samples and near 800 eV peak belongs to Co. On reducing the data to 10 eV, it is showing the merging of peak at 0 eV for both the samples showing the samples should be highly conductive even than silver (inset (ii)).
